# Supplementary material for: Green synthesis of Au nanoparticles using an aqueous extract ofStachys lavandulifoliaand their catalytic performance for alkyne/aldehyde/amine A3coupling reactions
Source: Royal Society of Chemistry journal article supplement (doi:10.1039/c8ra06819d), 2018-01-01
Supplement: c8ra06819d1.pdf [file c8ra06819d1.pdf]

## Green synthesis of Au nanoparticles using aqueous extract of *Stachys Lavandulifolia* and their catalytic performance for alkyne/aldehyde/amine A<sup>3</sup> coupling reactions

Hojat Veisi,<sup>\*,a</sup> Maliheh Farokhi,<sup>a</sup> Mona Hamelian,<sup>b</sup> Saba Hemmati<sup>a</sup>

<sup>a</sup>Department of Chemistry, Payame Noor University, Tehran, Iran

<sup>b</sup>Research Center of Oils and Fats, Kermanshah University of Medical Sciences, Kermanshah, Iran

E-mail: hojatveisi@yahoo.com

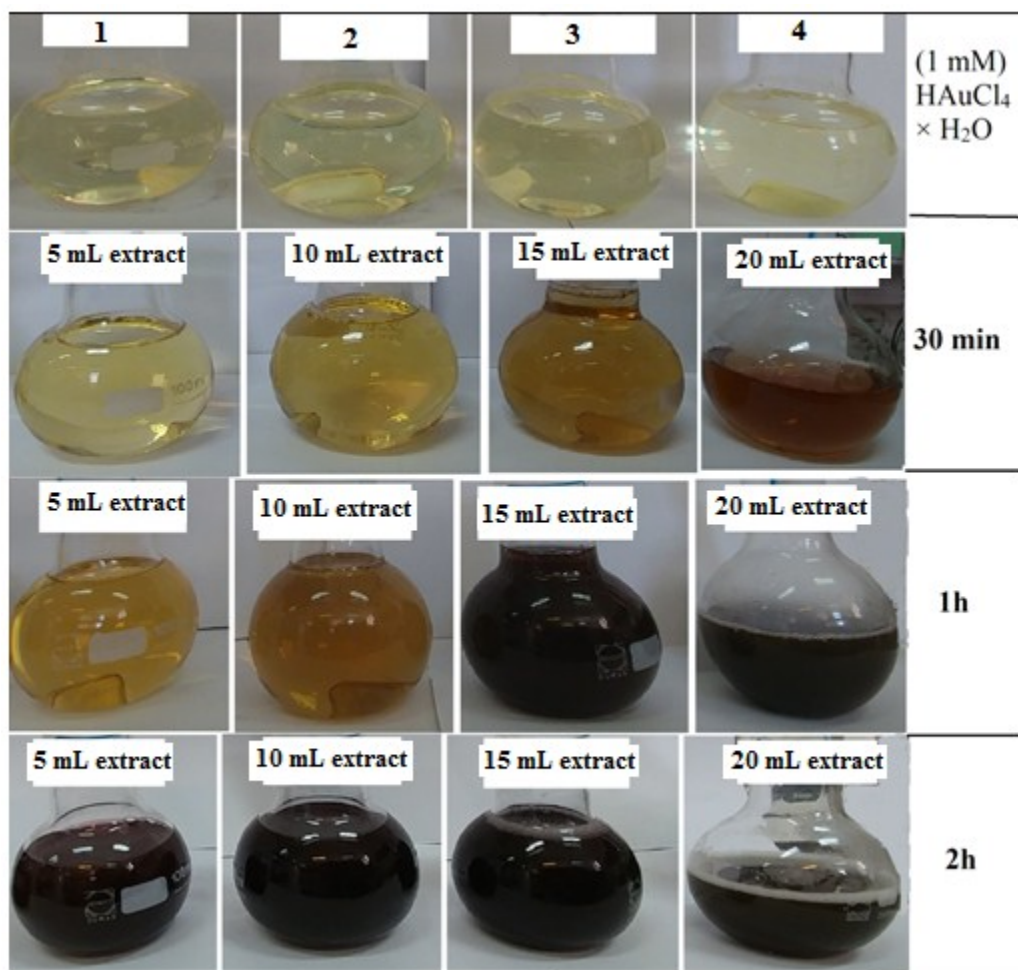

**Fig. 1S.** Effect of time and extract concentrations on synthesis gold nanoparticles.

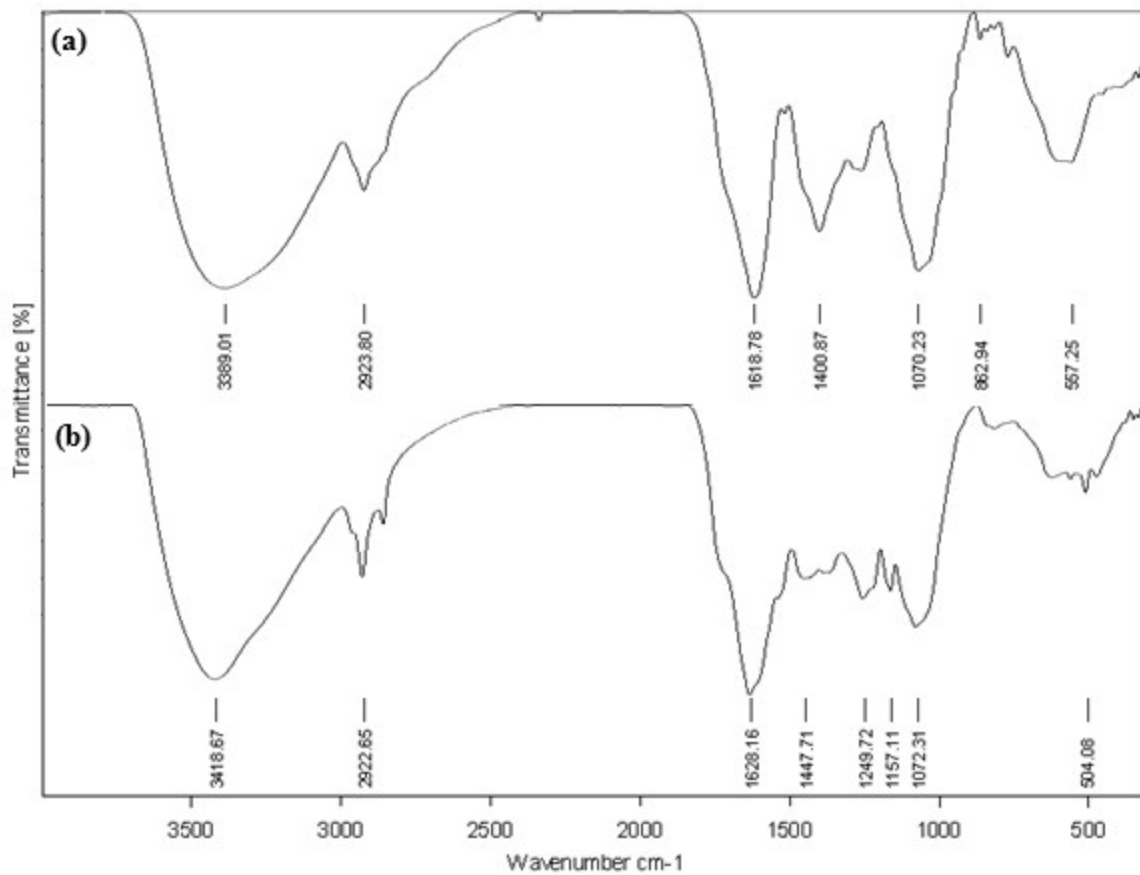

**Fig. 2S.** FT-IR spectra of extract of *Stachys Lavandulifolia* (a) and green synthesized Au NPs (b).

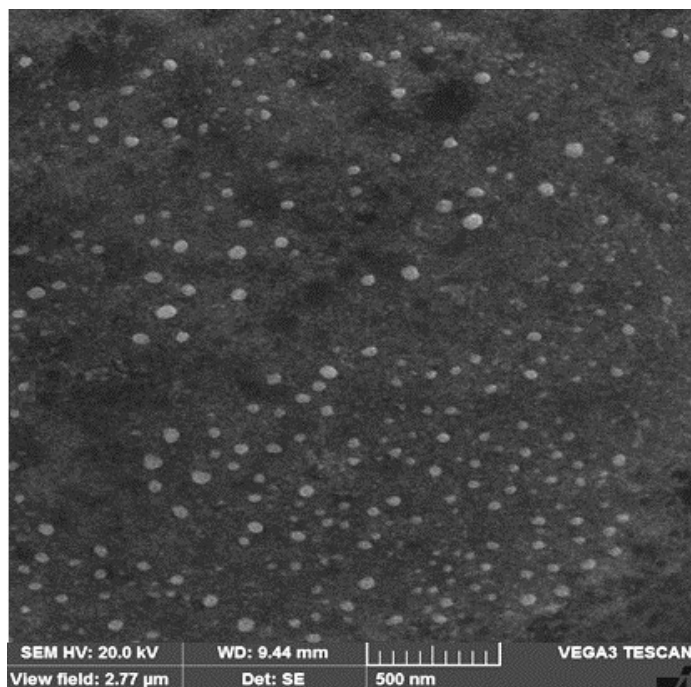

**Fig. 3S.** SEM image of Au/*S. lavandulifolia* NPs.

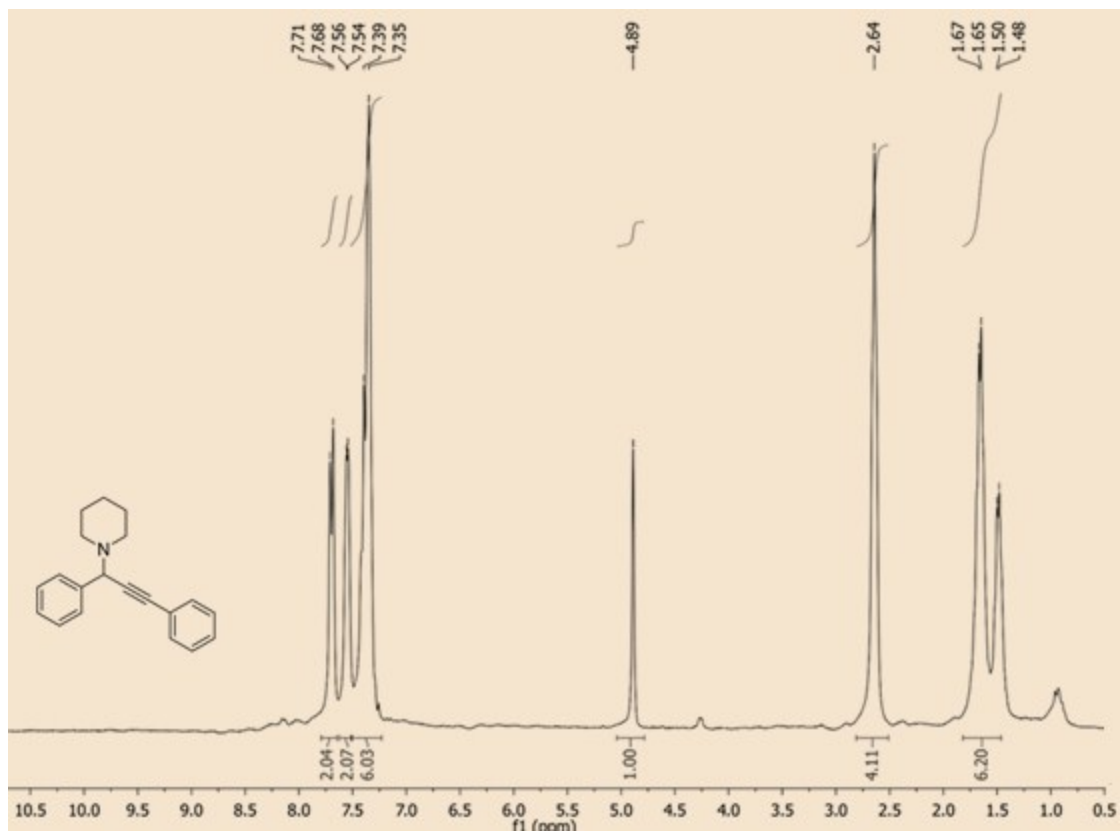

<sup>1</sup>H NMR

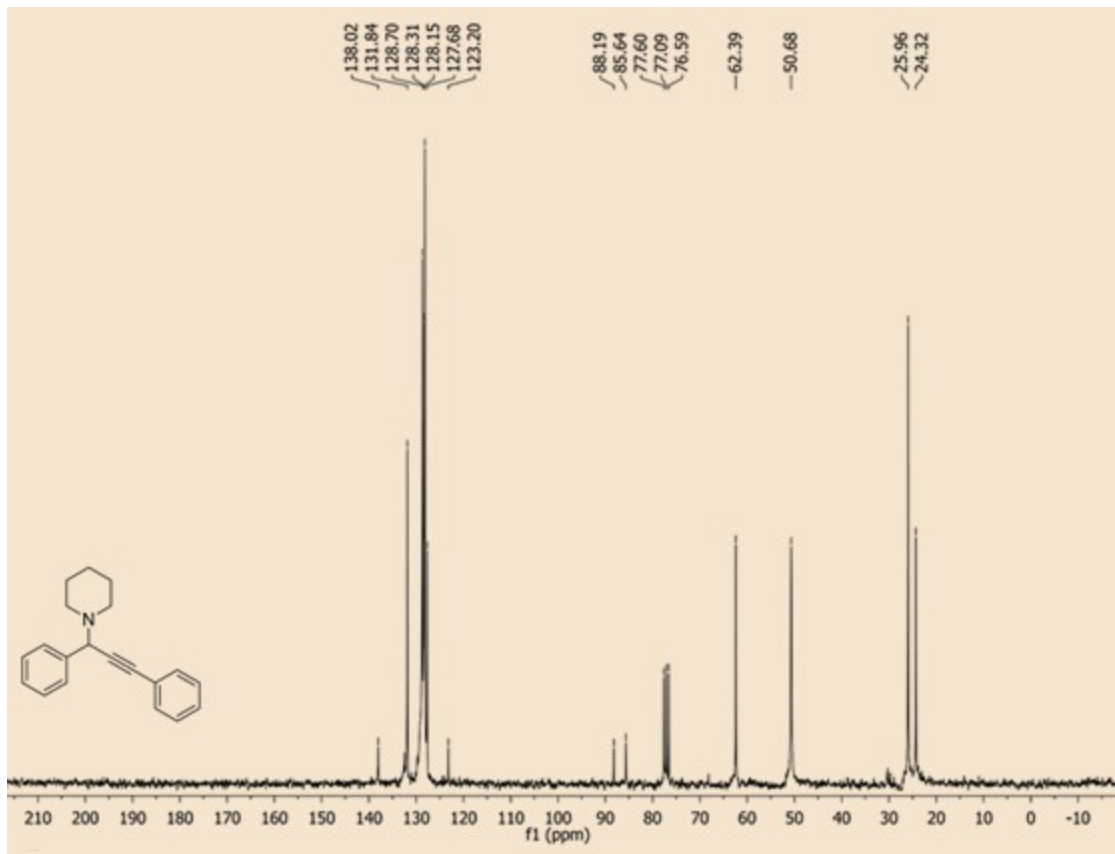

<sup>13</sup>C NMR

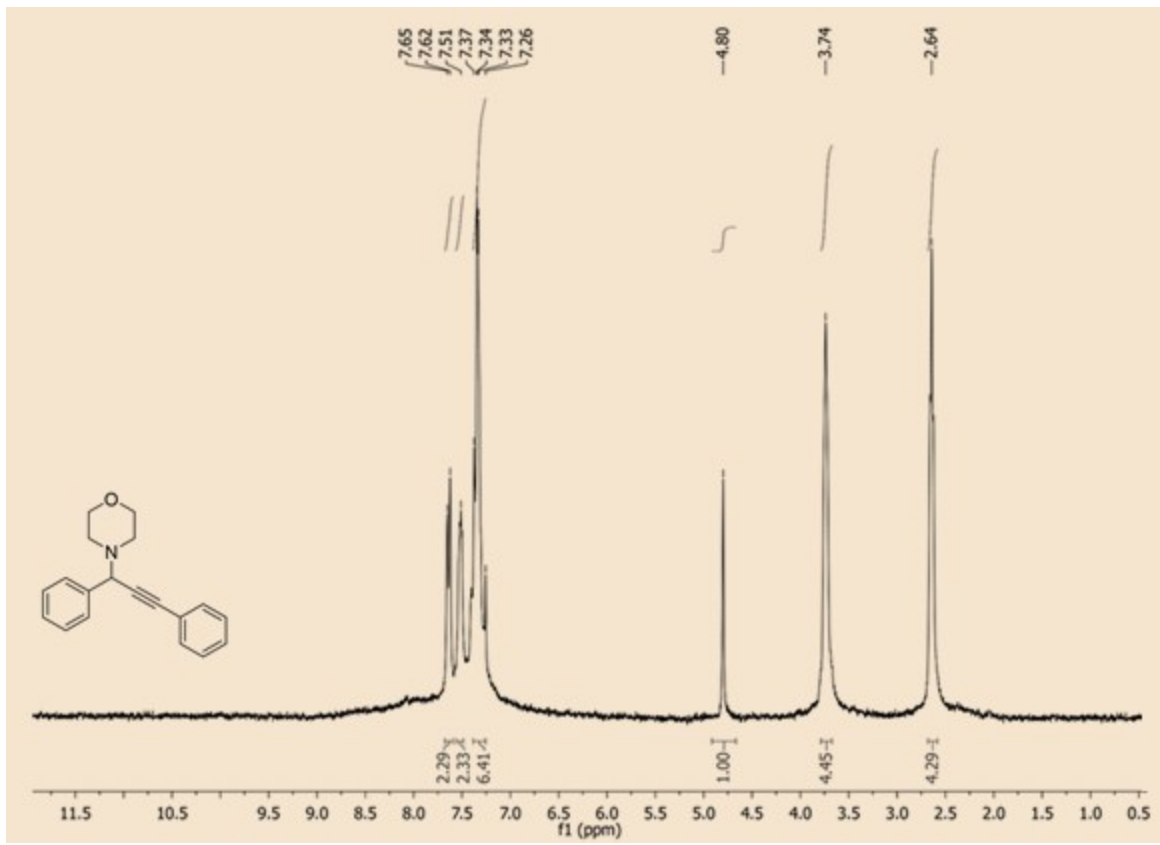

$^1\text{H}$  NMR

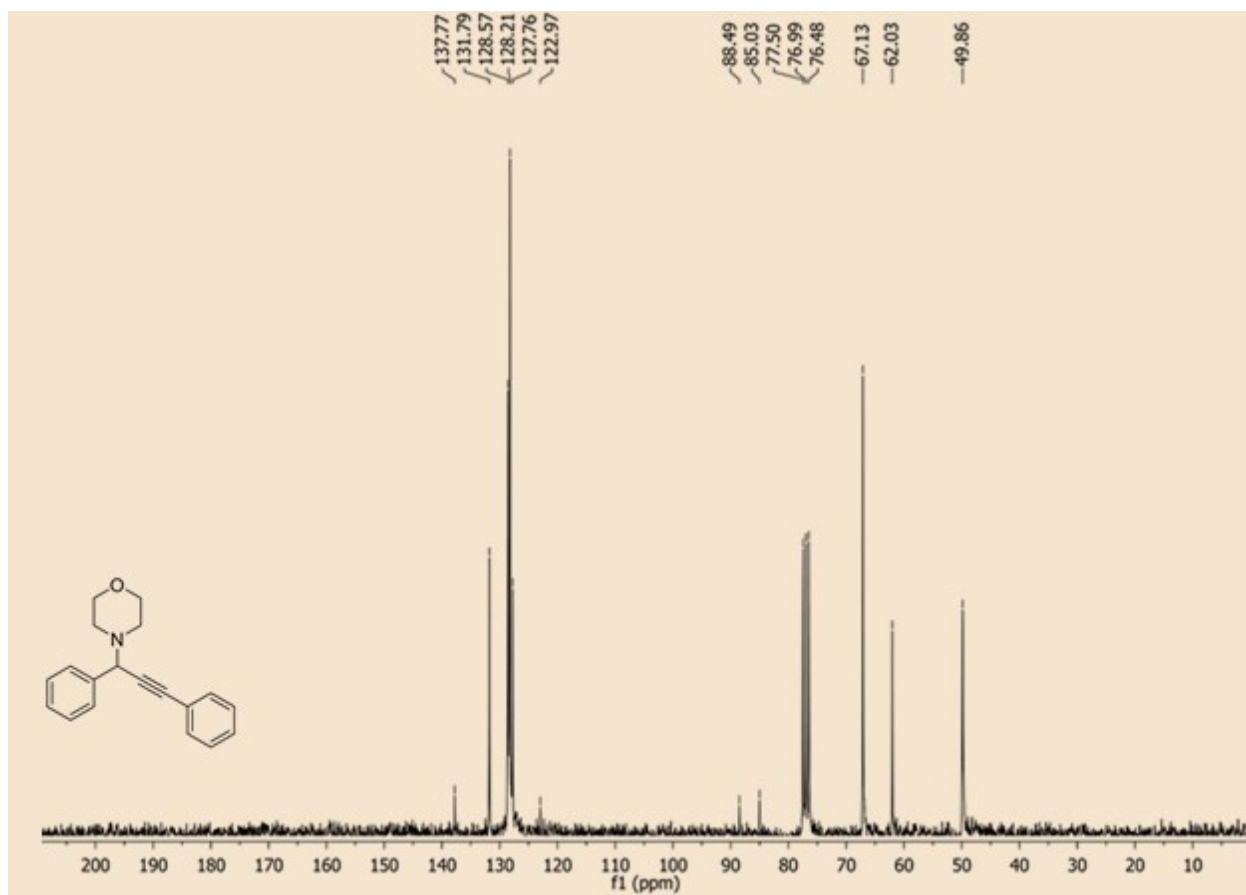

$^{13}\text{C}$  NMR
